# Supplementary material for: To contact or not: an investigation into the polymeric surface interactions with human insulin and their therapeutic implications
Source: Royal Society of Chemistry journal article supplement (doi:10.1039/d5ra08501b), 2026-01-01
Supplement: d5ra08501b3.pdf [file d5ra08501b3.pdf]

## Supplementary Information

# *To Contact or Not: An Investigation into the Polymeric Surface Interactions with Human Insulin and their Therapeutic Implications*

Megren H. A. Fagihi,<sup>1,2,3</sup> Chanaka Premathilaka,<sup>4</sup> Laura Zopf,<sup>2,5</sup> Tiina O'Neill,<sup>2</sup> Massimiliano Garré,<sup>6</sup> and Sourav Bhattacharjee<sup>2,5,7,8,9,\*</sup>

<sup>1</sup> School of Medicine, University College Dublin, Belfield, Dublin 4, Ireland

<sup>2</sup> Conway Institute of Biomolecular and Biomedical Research, University College Dublin, Belfield, Dublin 4, Ireland

<sup>3</sup> Clinical Laboratory Sciences Department, College of Applied Medical Sciences, Najran University, Najran 55461, Kingdom of Saudi Arabia

<sup>4</sup> Institute of Veterinary Medicine and Animal Sciences, Estonian University of Life Sciences, Tartu 51006, Estonia

<sup>5</sup> School of Veterinary Medicine, University College Dublin, Belfield, Dublin 4, Ireland

<sup>6</sup> Super-Resolution Imaging Consortium, Royal College of Surgeons in Ireland University of Medicine and Health Sciences, Dublin D02 YN77, Ireland

<sup>7</sup> UCD One Health Centre, University College Dublin, Belfield, Dublin 4, Ireland

<sup>8</sup> UCD Earth Institute, University College Dublin, Belfield, Dublin 4, Ireland

<sup>9</sup> Institut für Funktionelle Anatomie, Charité – Universitätsmedizin Berlin, Campus Charité Mitte, Philippstraße 11, 10115 Berlin, Germany

**\*Corresponding author**

Email: sourav.bhattacharjee@ucd.ie

T.: +353 1 716 6271

**Supplementary Information S1.** A 3D rendering of a dynamic scene showing the interactions between a FITC-insulin agglomerate (0.25 mg/mL) and amine-terminated particles ( $t = 48$  h). A 10  $\mu\text{m}$  scale bar is shown.

**Supplementary Information S2.** A 3D rendering of large insulin agglomerates (0.25 mg/mL) with entrapped acid-terminated polystyrene particles ( $t = 48$  h).
